# Supplementary material
Source: publisher figshare collection journal article supplement (https://tandf.figshare.com/ndownloader/files/14611259)
Supplement: Supplementary file 1 [file 14611259]

Supplemental Table I

|  | Total  (n = 567) | GNRI < 82  (n = 47) | 82≤GNRI<92  (n = 177) | 92≤GNRI <98  (n = 193) | GNRI ≥ 98  (n = 150) | P-value |
| --- | --- | --- | --- | --- | --- | --- |
| Age, years | 81.2 ± 9.2 | 79.0 ± 9.5 | 82.3 ± 8.0 | 81.3 ± 9.1 | 79.0 ± 12.4 | 0.08 |
| Male | 299 (52.7%) | 21 (44.7%) | 87 (49.2%) | 108 (56.0%) | 83 (55.3%) | 0.34 |
| White | 502 (88.7%) | 41 (87.2%) | 153 (86.4%) | 174 (90.6%) | 134 (89.3%) | 0.19 |
| Weight (kg) | 80.0 + 21.0 | 70.3 + 21.7 | 78.9 + 23.8 | 81.2 + 18.9 | 82.9 + 18.8 | **0.003** |
| BMI (kg/m2) | 28.7 ±7.1 | 25.3 ± 7.1 | 28.3 ± 7.7 | 29.2 ± 6.5 | 29.5 ± 6.4 | **0.003** |
| STS score | 8.2 ± 5.2 | 9.6 ± 6.1 | 9.6 ± 5.5 | 8.0 ± 5.1 | 6.5 ± 4.1 | **<0.001** |
| Albumin (mg/dL) | 3.5 ± 0.4 | 3.7 ± 0.5 | 3.5 ± 0.5 | 3.4 ± 0.5 | 3.5 ± 0.4 | **<0.001** |
| GNRI | 92.9 ± 7.5 | 77.5 ± 3.9 | 87.7 ± 2.4 | 94.5 ± 1.5 | 101.8 ± 3.3 | **<0.001** |
| Active malignancy | 65 (11.5%) | 4 (8.5%) | 22 (12.4%) | 20 (10.4%) | 19 (12.7%) | 0.81 |
| COPD | 162 (28.6%) | 14 (29.8%) | 53 (29.9%) | 60 (31.1%) | 35 (23.3%) | 0.42 |
| Diabetes | 241 (42.5%) | 16 (34.0%) | 78 (44.1%) | 84 (43.5%) | 63 (42.0%) | 0.65 |
| CKD | 261 (46.0%) | 25 (43.2%) | 86 (48.6%) | 89 (46.1%) | 61 (40.7%) | 0.37 |
| Dialysis | 27 (4.8%) | 8 (17.0%) | 9 (5.1%) | 3 (1.6%) | 7 (4.7%) | **<0.001** |
| Hypertension | 525 (92.6%) | 41 (87.2%) | 162 (91.5%) | 179 (92.7%) | 143 (95.3%) | 0.27 |
| Peripheral artery disease | 128 (22.6%) | 12 (25.5%) | 39 (22.0%) | 47 (24.4%) | 30 (20.0%) | 0.76 |
| Dyslipidemia | 430 (75.8%) | 26 (55.3%) | 137 (77.4%) | 146 (75.6%) | 121 (80.7%) | **0.005** |
| Previous stroke | 76 (13.4%) | 4 (8.5%) | 29 (16.4%) | 23 (11.9%) | 20 (13.3%) | 0.44 |
| Previous CABG | 148 (26.1%) | 7 (14.9%) | 44 (24.9%) | 54 (28.0%) | 43 (28.7%) | 0.25 |
| Previous myocardial infarction | 127 (22.5%) | 6 (12.8%) | 38 (21.6%) | 48 (25.0%) | 35 (23.3%) | 0.34 |
| Syncope | 49 (8.6%) | 4 (8.5%) | 21 (11.9%) | 15 (7.8%) | 9 (6.0%) | 0.28 |
| Stable angina | 88 (15.5%) | 7 (14.9%) | 29 (16.4%) | 29 (15.0%) | 33 (22.0%) | 0.35 |
| Cirrhosis | 21 (3.7%) | 2 (4.3%) | 11 (6.2%) | 1 (0.5%) | 7 (4.7%) | **0.03** |
| Obstructive sleep apnea | 59 (10.4%) | 5 (10.6%) | 17 (9.6%) | 17 (8.8%) | 20 (13.3%) | 0.57 |
| Atrial fibrillation | 256 (45.1%) | 28 (59.6%) | 80 (45.2%) | 85 (44.0%) | 63 (42.0%) | 0.20 |
| Pacemaker | 98 (17.3%) | 7 (14.9%) | 34 (19.2%) | 33 (17.1%) | 24 (16.0%) | 0.84 |
| RBBB | 57 (10.1%) | 5 (10.6%) | 12 (6.8%) | 24 (12.4%) | 16 (10.7%) | 0.33 |
| LBBB | 33 (5.8%) | 4 (8.5%) | 11 (6.2%) | 14 (7.3%) | 3 (2.7%) | 0.26 |
| AV block | 64 (11.3%) | 6 (12.8%) | 12 (6.8%) | 31 (16.1%) | 15 (10.1%) | **0.04** |
| LVEF | 52.4 ±13.4 | 48.4 ± 15.7 | 50.6 ± 14.6 | 49.5 ± 15.3 | 53.0 ± 13.3 | 0.10 |
| NYHA class |  |  |  |  |  | **0.02** |
| I | 9 (1.6%) | 1 (2.1%) | 2 (1.1%) | 1 (0.5%) | 5 (3.3%) |  |
| II | 131 (23.1%) | 10 (21.3%) | 28 (15.8%) | 44 (22.8%) | 49 (32.7%) |  |
| III | 402 (70.9%) | 34 (72.3%) | 137 (77.4%) | 142 (73.6%) | 89 (59.3%) |  |
| IV | 25 (4.4%) | 2 (4.3%) | 10 (5.6%) | 6 (3.1%) | 7 (4.7%) |  |
| Approach |  |  |  |  |  | 0.58 |
| Transfemoral | 515 (90.8%) | 43 (91.5%) | 156 (88.1%) | 177 (91.7%) | 139 (92.7%) |  |
| Transapical | 24 (4.2%) | 2 (4.3%) | 8 (4.5%) | 8 (4.1%) | 6 (4.0%) |  |
| Transsubclavian | 6 (1.1%) | 0 (0%) | 1 (0.6%) | 3 (1.6%) | 2 (1.3%) |  |
| Transaortic | 22 (3.9%) | 2 (4.3%) | 8 (4.5%) | 8 (4.1%) | 6 (4.0%) |  |
| Procedural length, min | 89.7 ± 37.7 | 83.8 ± 30.7 | 96.5 ± 45.5 | 87.0 ± 36.8 | 87.4 ± 30.0 | 0.08 |
| Contrast volume, mL | 85.5 ± 54.7 | 74.4 ± 41.4 | 85.8 ± 46.8 | 87.4 ± 51.1 | 86.2 ± 69.3 | 0.57 |
| Fluoroscopic time, min | 20.9 ± 13.3 | 19.4 ± 9.4 | 21.6 ± 11.3 | 20.0 ± 9.3 | 21.6 ± 9.4 | 0.56 |

Supplemental Table I: Baseline characteristics and procedural information

Abbreviations for Table I: BMI – body mass index, STS – Society of Thoracic Surgeons, GNRI – geriatric nutritional risk index, COPD – chronic obstructive pulmonary disease, CKD – chronic kidney disease, CABG – coronary artery bypass graft, RBBB – right bundle branch block, LBBB – left bundle branch block, AV – atrioventricular, LVEF – left ventricular ejection fraction, NYHA – New York Heart Association
